# Supplementary material for: Copper shape-templated N-doped carbons: exercising selective surface area control for lithium-ion batteries & beyond
Source: Royal Society of Chemistry journal article supplement (doi:10.1039/d4ta00427b), 2024-01-01
Supplement: d4ta00427b1.pdf [file d4ta00427b1.pdf]

# Copper Shape-Templated N-Doped Carbons: Exercising Selective Surface Area Control for Lithium-Ion Batteries & Beyond

## Supporting Information

*Samantha N. Lauro,<sup>a</sup> James N. Burrow,<sup>b</sup> Benjamin G. Broekhuis,<sup>b</sup> Philippe Papa,<sup>a,b</sup> and C.  
Buddie Mullins<sup>\*a,b,c</sup>*

*a* Department of Chemistry, The University of Texas at Austin, Austin, Texas 78712-1224,  
United States.

*b* McKetta Department of Chemical Engineering, The University of Texas at Austin, Austin, Texas  
78712-1589, United States.

*c* Texas Materials Institute, The University of Texas at Austin, Austin, Texas 78712-1591,  
United States.

## **Table of Contents**

|                                                                                                 |
|-------------------------------------------------------------------------------------------------|
| <b>S-3: Figure S1- Additional SEM images of carbon materials</b>                                |
| <b>S-4: Figure S2: SEM Image of Copper Template &amp; N-Doped Carbon Populations</b>            |
| <b>S-5: Calculations for Scherrer Analysis of XRD Patterns</b>                                  |
| <b>S-6: Table S1- Estimated Crystallite Parameters of N-Doped Carbons from XRD</b>              |
| <b>S-7: Figure S3- Example Raman Spectra Fit</b>                                                |
| <b>S-7: Table S2- Raman Fitting Parameters for N-Doped Carbons</b>                              |
| <b>S-8: Figure S4-XPS Survey Scans of N-Doped Carbons</b>                                       |
| <b>S-8: Table S3- XPS Elemental Composition of N-Doped Carbons</b>                              |
| <b>S-9: Figure S5- XPS N1s Region Scans of N-Doped Carbons</b>                                  |
| <b>S-9: Table S4- XPS Nitrogen Composition of N-Doped Carbons</b>                               |
| <b>S-10: Figure S6- Nitrogen and CO<sub>2</sub> Adsorption Isotherms from BET</b>               |
| <b>S-11: Figure S7- Individual Variable Rate Cycling for Duplicate Cells</b>                    |
| <b>S-12: Table S5- Average Capacity for Variable Rate Cycling</b>                               |
| <b>S-13: Figure S8- Individual Long-term Cycling for Duplicate Cells</b>                        |
| <b>S-14: Table S6- Average Capacity and Coulombic Efficiency for Long-term Cycling</b>          |
| <b>S-14: Figure S9- Differential Capacity Curves of N-Doped Carbons at 0.2 A g<sup>-1</sup></b> |
| <b>S-15: Figure S10- Post Mortem SEM &amp; EDX of Cycled Electrodes</b>                         |
| <b>S-15: Figure S11- Cyclic Voltammograms of N-Doped Carbons</b>                                |
| <b>S-16: Figure S12- Comparative Plot of N-Doped carbons to Previous Literature</b>             |
| <b>S-17: References</b>                                                                         |

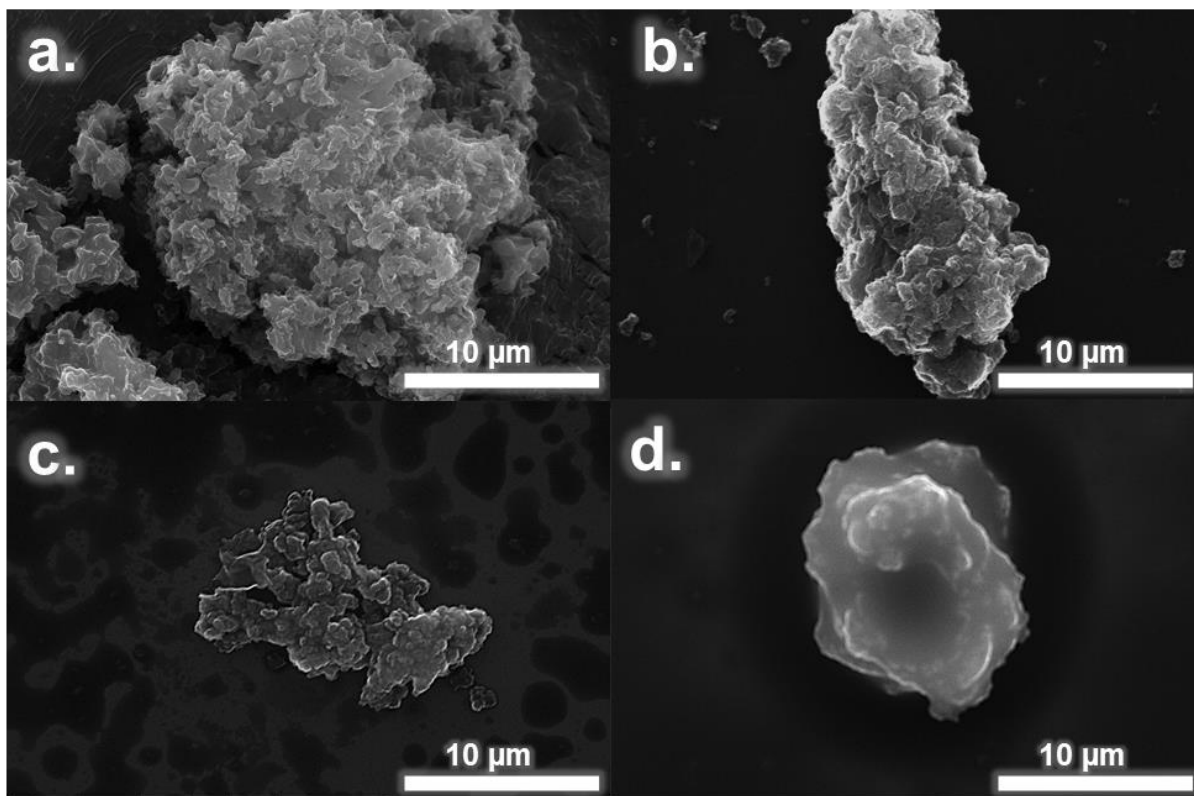

**Figure S1.** Additional zoomed-in SEM images of g-C<sub>3</sub>N<sub>4</sub> precursor (**a**), dendritic templated N-doped carbon (**b**), flake templated N-doped carbon (**c**), and spheroidal templated N-doped carbon (**d**).

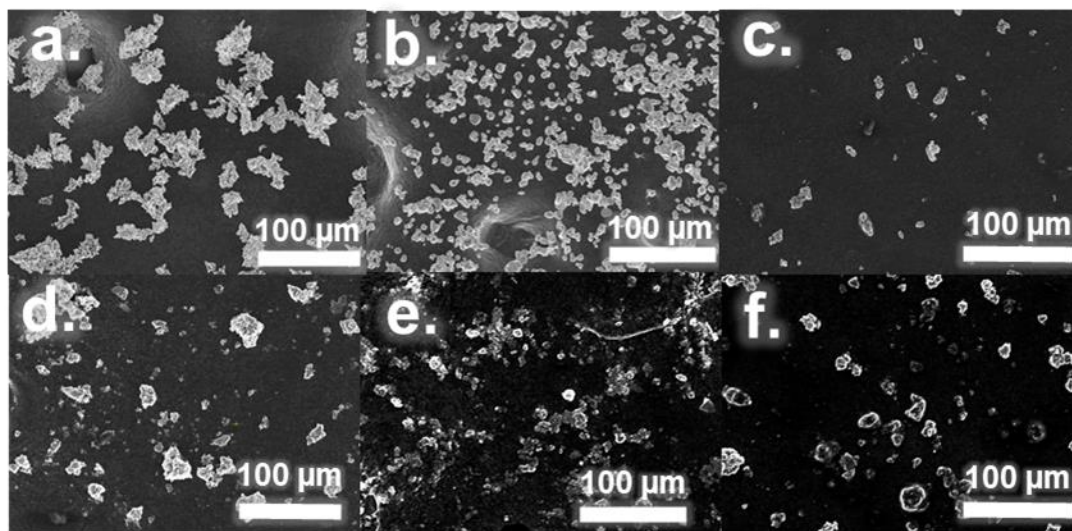

**Figure S2.** SEM images of population of dendritic copper (a), spheroidal copper (b), flake copper (c), dendritic-copper templated N-doped carbons (d), spheroidal-copper templated N-doped carbons (e), and flake-copper templated N-doped carbons (f).

For analysis of the XRD patterns:

The d-spacing ( $d$ ) was determined by using the Bragg equation:

$$2d \sin \theta = n\lambda$$

where:

$n$  is a positive integer

$\lambda$  is the x-ray wavelength (1.5418 Å)

$\theta$  is the Bragg angle in radians

The crystallite size ( $L_c$  and  $L_a$ ) was determined by using the Scherrer equation:

$$L = \frac{K\lambda}{\beta \cos \theta}$$

where:

$L$  is the average crystallite size

$\lambda$  is the x-ray wavelength (1.5418 Å)

$K$  is the shape parameter (0.89 for  $L_c$  and 1.84 for  $L_a$ )

$\beta$  is the FWHM in radians

$\theta$  is the Bragg angle in radians

**Table S1. Estimated Crystallite Parameters of N-Doped Carbons from XRD**

| <b>Sample</b> | <b><math>L_c</math> (Å)</b> | <b><math>d_{002}</math> (Å)</b> | <b>002 # of sheets</b> | <b><math>L_a</math> (Å)</b> | <b><math>d_{101}</math> (Å)</b> | <b>101 # of repeats</b> |
|---------------|-----------------------------|---------------------------------|------------------------|-----------------------------|---------------------------------|-------------------------|
| Dendritic     | 11.14                       | 3.36                            | 3.31                   | 8.71                        | 4.29                            | 2.03                    |
| Spheroidal    | 10.13                       | 3.40                            | 2.97                   | 6.98                        | 4.26                            | 1.64                    |
| Flake         | 10.76                       | 3.41                            | 3.15                   | 6.45                        | 4.19                            | 1.54                    |

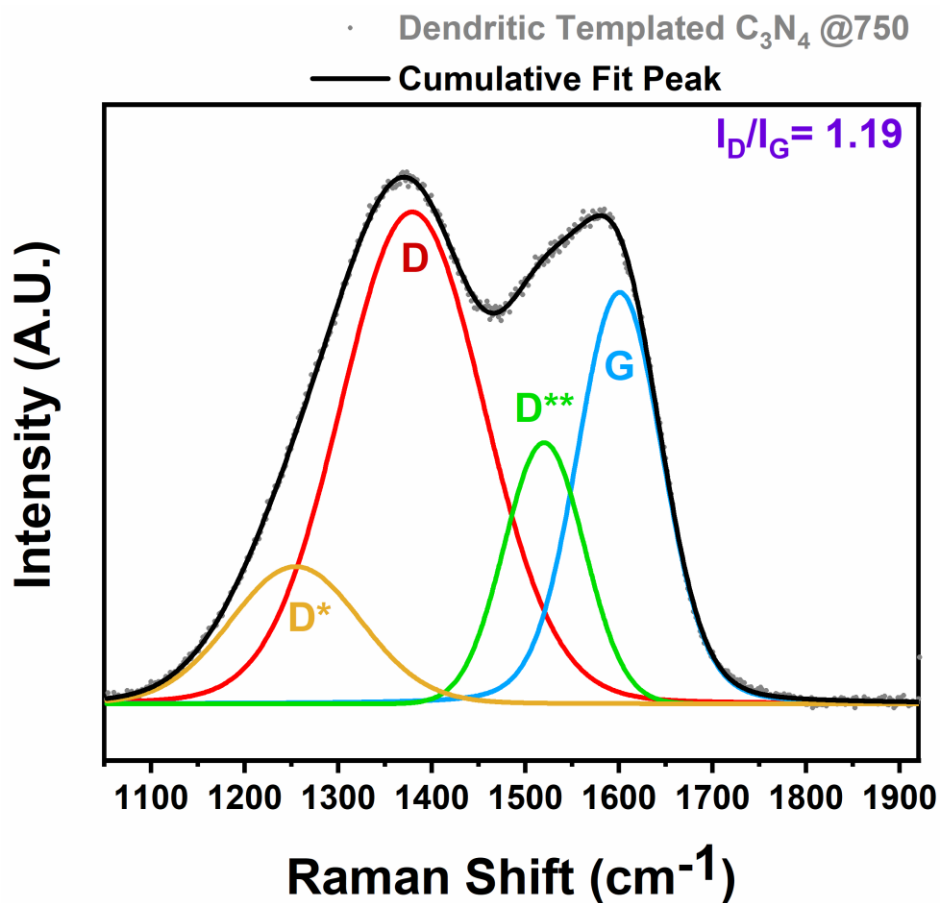

**Figure S3.** Example of Raman spectra fitting to determine the  $I_D/I_G$  ratio. Spectra were fit with four peaks representing the D\*, D, D\*\*, and G band.

**Table S2.** Raman Fitting Parameters for N-Doped Carbons

| Sample     | D*                      | D                       | D**                     | G                       | $I_D/I_G$ |
|------------|-------------------------|-------------------------|-------------------------|-------------------------|-----------|
| Dendritic  | 1254.6 cm <sup>-1</sup> | 1379.1 cm <sup>-1</sup> | 1520.0 cm <sup>-1</sup> | 1600.8 cm <sup>-1</sup> | 1.19      |
| Spheroidal | 1219.6 cm <sup>-1</sup> | 1365.5 cm <sup>-1</sup> | 1501.6 cm <sup>-1</sup> | 1588.6 cm <sup>-1</sup> | 1.19      |
| Flake      | 1241.1 cm <sup>-1</sup> | 1366.1 cm <sup>-1</sup> | 1505.8 cm <sup>-1</sup> | 1591.9 cm <sup>-1</sup> | 1.20      |

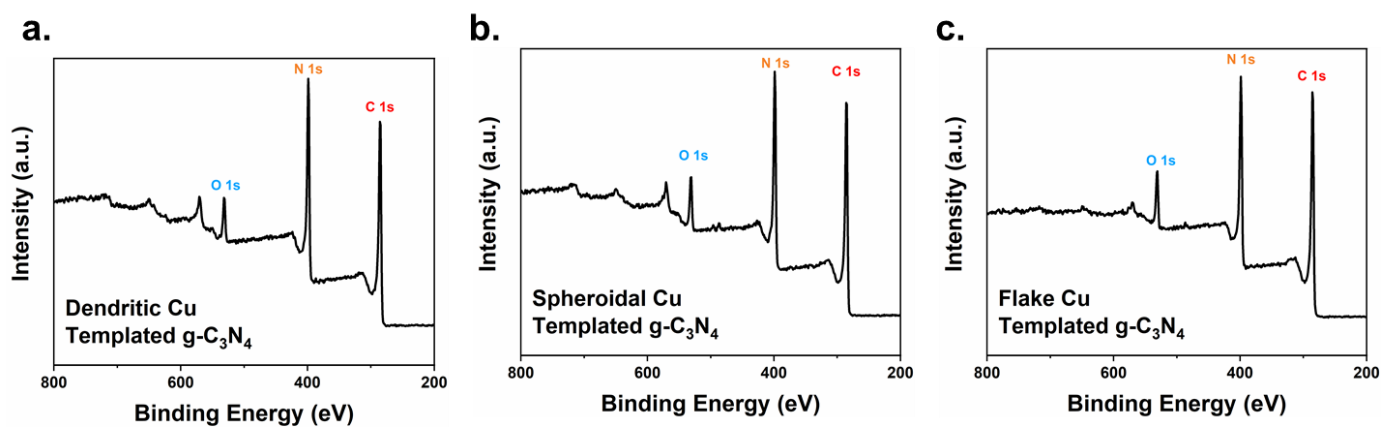

**Figure S4.** XPS survey scans of dendritic (a) spheroidal (b) and flake(c) templated carbons.

**Table S3.** XPS Elemental Composition of N-Doped Carbons

| Sample     | % Carbon | % Nitrogen | % Oxygen | % Copper |
|------------|----------|------------|----------|----------|
| Dendritic  | 62.6     | 31.2       | 4.9      | 1.4      |
| Spheroidal | 62.9     | 30.2       | 5.8      | 1.2      |
| Flake      | 63.7     | 31.0       | 5.1      | 0.3      |



**a. Dendritic Cu  
Templated g-C<sub>3</sub>N<sub>4</sub>**

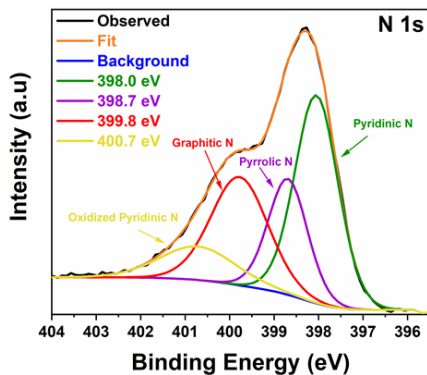

**b. Spheroidal Cu  
Templated g-C<sub>3</sub>N<sub>4</sub>**

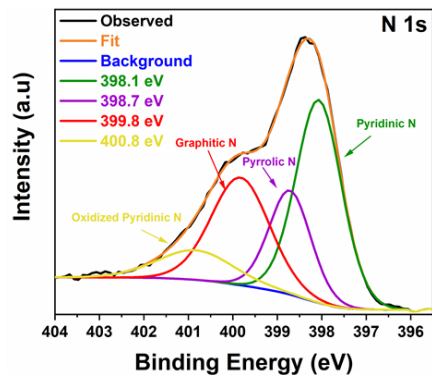

**c. Flake Cu  
Templated g-C<sub>3</sub>N<sub>4</sub>**

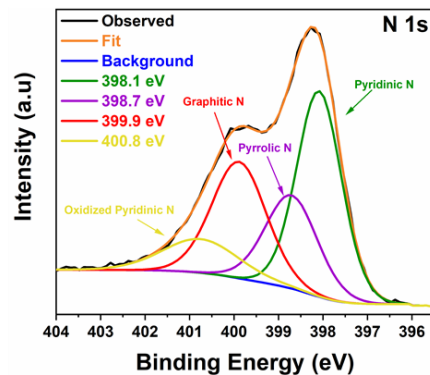

**Figure S5.** XPS N1s region scans of dendritic (a) spheroidal (b) and flake(c) templated carbons.

**Table S4.** XPS Nitrogen Composition of N-Doped Carbons

| Sample     | Fractional<br>% Pyridinic<br>N | Fractional<br>% Pyrrolic<br>N | Fractional<br>% Graphitic<br>N | Fractional %<br>Oxidized N |
|------------|--------------------------------|-------------------------------|--------------------------------|----------------------------|
| Dendritic  | 40.4                           | 20.5                          | 27.8                           | 11.3                       |
| Spheroidal | 41.8                           | 19.7                          | 28.4                           | 10.1                       |
| Flake      | 40.1                           | 21.2                          | 27.6                           | 11.1                       |

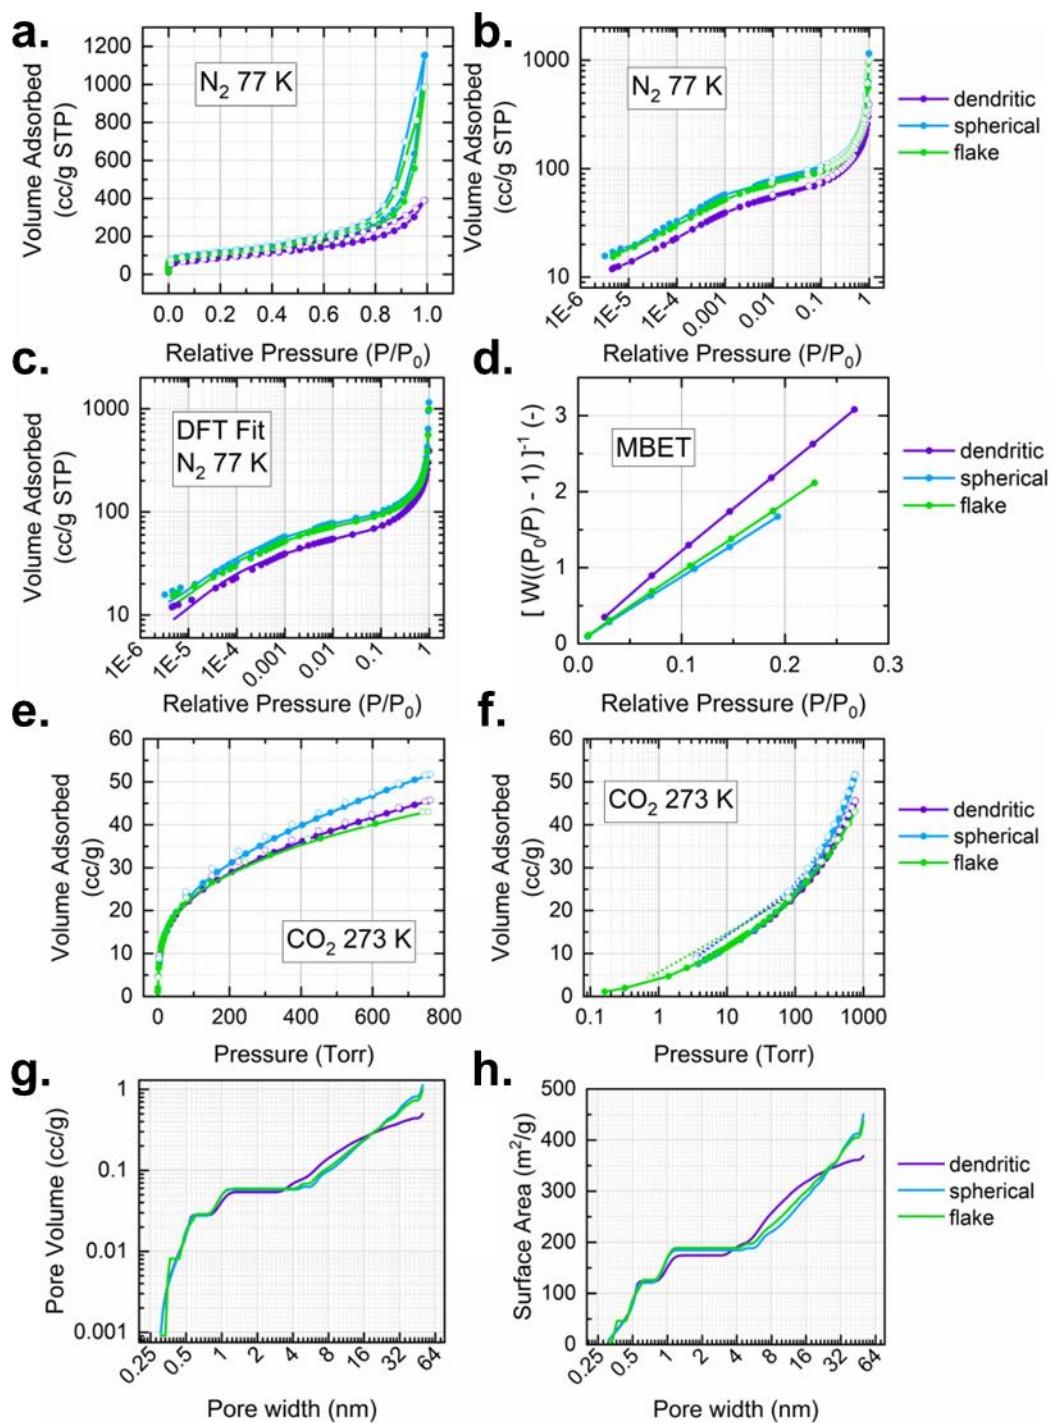

**Figure S6.** Gas adsorption isotherms employed for porosimetry. **a-c)**  $N_2$  isotherms at 77 K plotted over linear (**a**) and logarithmic (**b**) scales, and DFT fits (**c**). Multi-point BET analysis of  $N_2$  adsorption employed for surface area quantification (**d**).  $CO_2$  isotherms at 273 K to quantify ultramicroporosity, plotted over linear (**e**) and logarithmic (**f**) scale. Pore volume (**g**) and surface area (**h**) distributions.

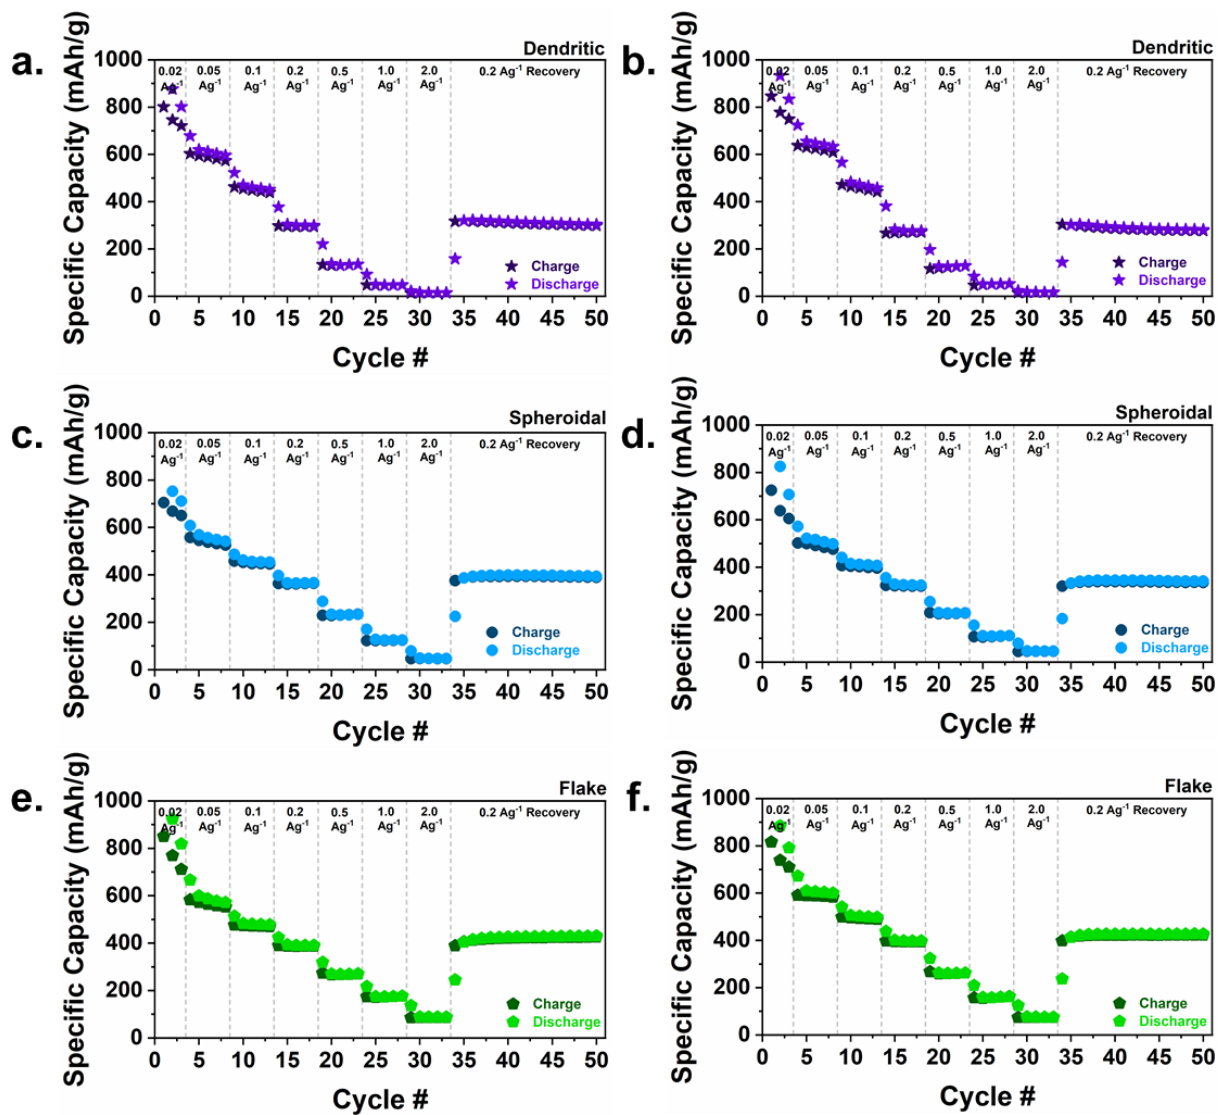

**Figure S7.** Variable rate cycling of duplicate cells for dendritic (a, b), spheroidal (c, d), and flake (e, f) templated carbons.

**Table S5. Average Capacity for Variable Rate Cycling**

| <b>Sample</b> | <b>Capacity at<br/>0.05 A g<sup>-1</sup><br/>(mAh g<sup>-1</sup>)</b> | <b>Capacity<br/>at 0.1 A g<sup>-1</sup><br/>(mAh g<sup>-1</sup>)</b> | <b>Capacity<br/>at 0.2 A g<sup>-1</sup><br/>(mAh g<sup>-1</sup>)</b> | <b>Capacity<br/>at 0.5 A g<sup>-1</sup><br/>(mAh g<sup>-1</sup>)</b> | <b>Capacity<br/>at 1.0 A g<sup>-1</sup><br/>(mAh g<sup>-1</sup>)</b> | <b>Capacity<br/>at 2.0 A g<sup>-1</sup><br/>(mAh g<sup>-1</sup>)</b> |
|---------------|-----------------------------------------------------------------------|----------------------------------------------------------------------|----------------------------------------------------------------------|----------------------------------------------------------------------|----------------------------------------------------------------------|----------------------------------------------------------------------|
| Dendritic     | 640 ± 4%                                                              | 481 ± 3%                                                             | 308 ± 4%                                                             | 146 ± 5%                                                             | 58 ± 1%                                                              | 17 ± 8%                                                              |
| Spheroidal    | 544 ± 5%                                                              | 440 ± 7%                                                             | 352 ± 8%                                                             | 230 ± 8%                                                             | 127 ± 9%                                                             | 54 ± 1%                                                              |
| Flake         | 610 ± 2%                                                              | 498 ± 3%                                                             | 403 ± 2%                                                             | 277 ± 2%                                                             | 177 ± 6%                                                             | 92 ± 10%                                                             |

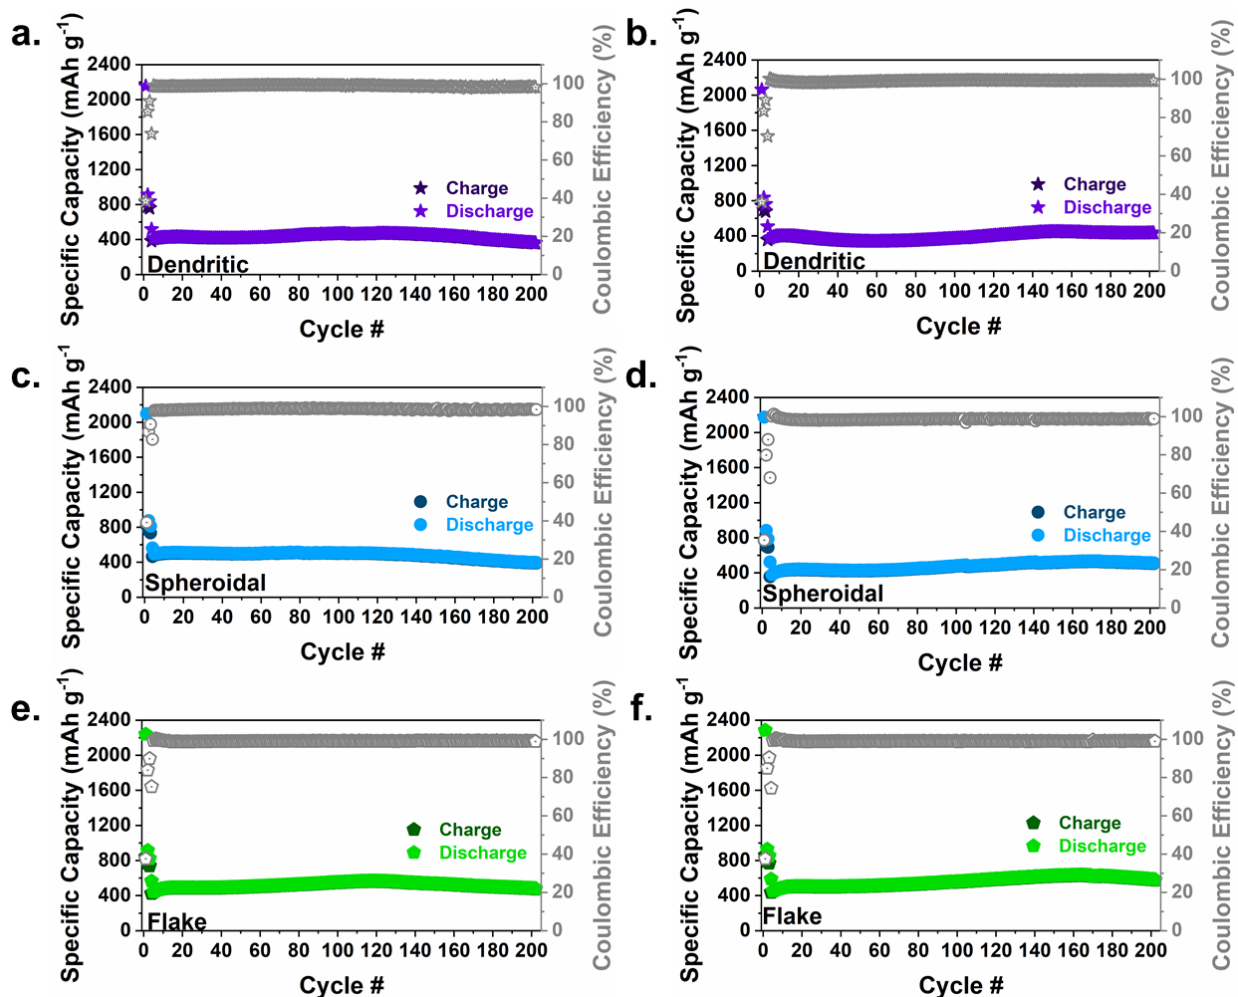

**Figure S8.** Long-term cycling at  $0.2 \text{ A g}^{-1}$  with three formation cycles at  $0.02 \text{ A g}^{-1}$  of duplicate cells for dendritic (a, b), spheroidal (c, d), and flake (e, f) templated carbons. It should be noted that the cells represented in (a,c,e) were cycled at the same time, and cells represented in (b,d,f) were cycled together but at a separate time from (a,c,e). Slight differences in the room temperature during these time periods correlates to the change in curve shape between the two sample sets.

**Table S6. Average Capacity and Coulombic Efficiency for Long-term Cycling**

| Sample     | Average Capacity<br>(mAh g <sup>-1</sup> ) | Average Coulombic<br>Efficiency (%) |
|------------|--------------------------------------------|-------------------------------------|
| Dendritic  | 416 ± 6%                                   | 98.8± 0.1                           |
| Spheroidal | 483± 1%                                    | 98.9± 0.2                           |
| Flake      | 541± 6%                                    | 98.9± 0.1                           |

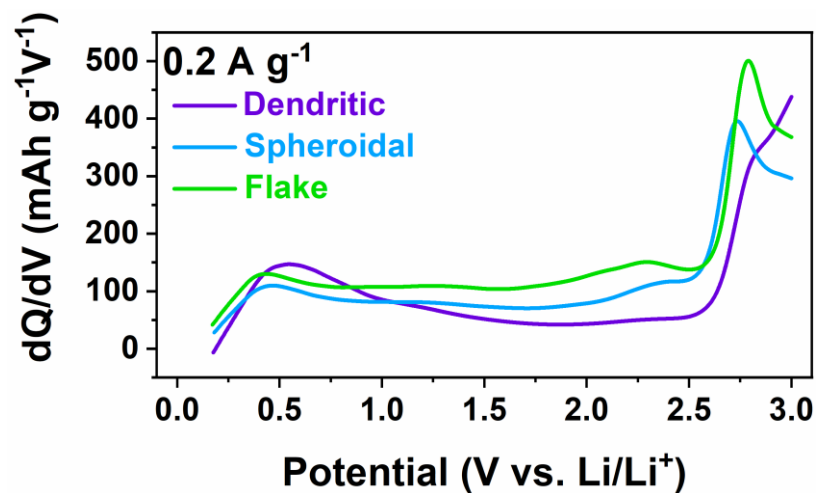

**Figure S9.** Absolute dQ dV<sup>-1</sup> curve of flake, spheroidal and dendritic N-doped carbons of lithium extraction at a cycling rate of 0.2 A g<sup>-1</sup>.



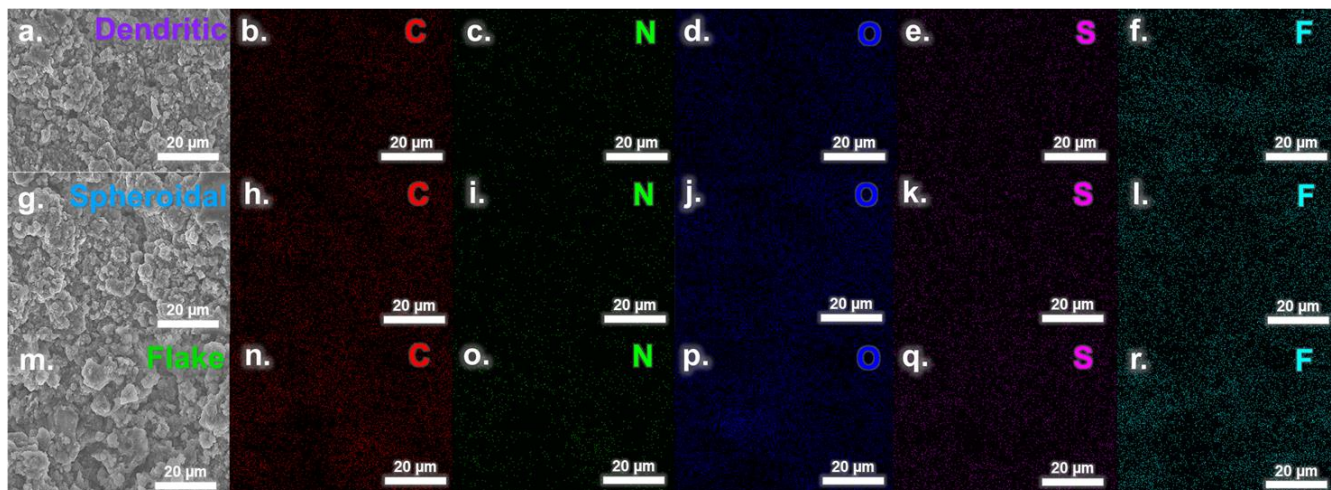

**Figure S10.** Post-mortem analysis of cycled carbon electrodes. SEM image of cycled dendritic N-doped carbon electrode (a) and corresponding EDX of carbon (b), nitrogen (c), oxygen (d), sulfur (e), and fluorine (f) signal in SEI. SEM image of cycled spheroidal N-doped carbon electrode (g) and corresponding EDX of carbon (h), nitrogen (i), oxygen (j), sulfur (k), and fluorine (l) signal in SEI. SEM image of cycled flake N-doped carbon electrode (m) and corresponding EDX of carbon (n), nitrogen (o), oxygen (p), sulfur (q), and fluorine (r) signal in SEI.

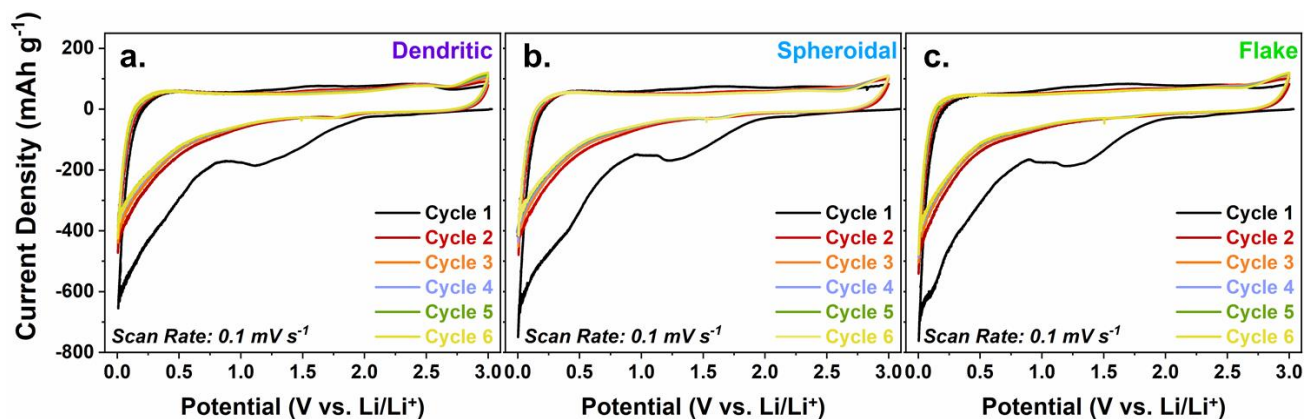

**Figure S11.** Cyclic voltammograms at a scan rate of  $0.1 \text{ mV s}^{-1}$  of dendritic (a), spheroidal (b), and flake (c) templated carbons.

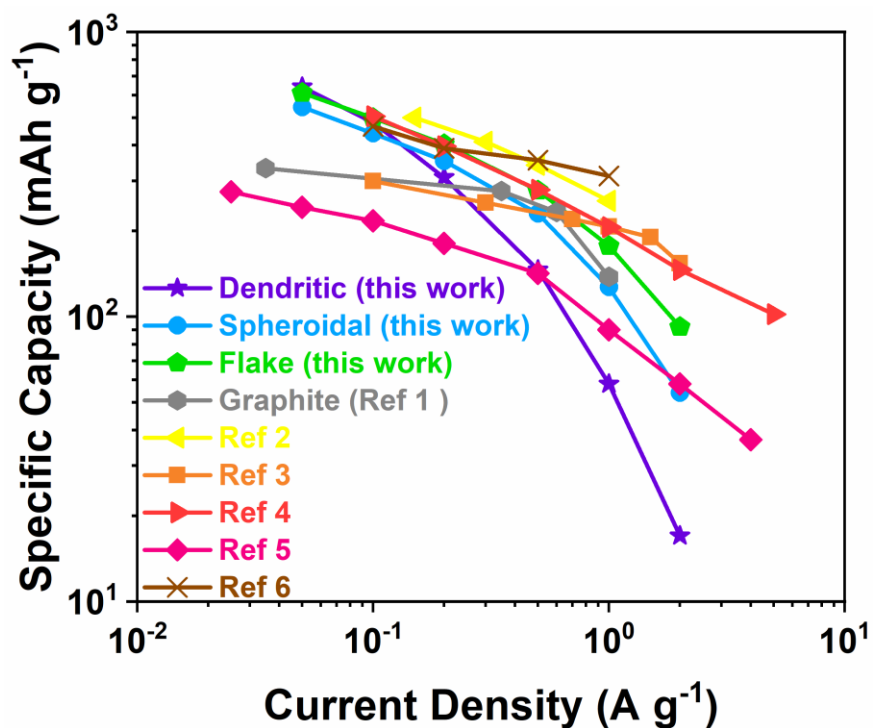

**Figure S12.** Comparative plot of dendritic, spheroidal, and flake carbons from this work compared to graphite,<sup>1</sup> and previous reported N-doped carbon microspheres,<sup>2</sup> protein derived N-doped carbon,<sup>3</sup> covalent-organic framework derived N-doped carbon,<sup>4</sup> garlic-peel derived N-doped carbon,<sup>5</sup> and N-doped carbon nanotubes.<sup>6</sup>



## References

- (1) Jang, D.; Suh, S.; Yoon, H.; Kim, J.; Kim, H.; Baek, J.; Kim, H.-J. Enhancing Rate Capability of Graphite Anodes for Lithium-Ion Batteries by Pore-Structuring. *Applied Surface Science Advances* **2021**, *6*, 100168. <https://doi.org/10.1016/j.apsadv.2021.100168>.
- (2) Chen, T.; Pan, L.; J. Loh, T. A.; C. Chua, D. H.; Yao, Y.; Chen, Q.; Li, D.; Qin, W.; Sun, Z. Porous Nitrogen-Doped Carbon Microspheres as Anode Materials for Lithium Ion Batteries. *Dalton Transactions* **2014**, *43* (40), 14931–14935. <https://doi.org/10.1039/C4DT01223B>.
- (3) An, G.-H.; Kim, H.; Ahn, H.-J. Surface Functionalization of Nitrogen-Doped Carbon Derived from Protein as Anode Material for Lithium Storage. *Applied Surface Science* **2019**, *463*, 18–26. <https://doi.org/10.1016/j.apsusc.2018.08.201>.
- (4) Zhang, X.; Zhu, G.; Wang, M.; Li, J.; Lu, T.; Pan, L. Covalent-Organic-Frameworks Derived N-Doped Porous Carbon Materials as Anode for Superior Long-Life Cycling Lithium and Sodium Ion Batteries. *Carbon* **2017**, *116*, 686–694. <https://doi.org/10.1016/j.carbon.2017.02.057>.
- (5) Selvamani, V.; Ravikumar, R.; Suryanarayanan, V.; Velayutham, D.; Gopukumar, S. Garlic Peel Derived High Capacity Hierarchical N-Doped Porous Carbon Anode for Sodium/Lithium Ion Cell. *Electrochimica Acta* **2016**, *190*, 337–345. <https://doi.org/10.1016/j.electacta.2016.01.006>.
- (6) Li, J.; Zhang, F.; Wang, C.; Shao, C.; Li, B.; Li, Y.; Wu, Q.-H.; Yang, Y. Self Nitrogen-Doped Carbon Nanotubes as Anode Materials for High Capacity and Cycling Stability Lithium-Ion Batteries. *Materials & Design* **2017**, *133*, 169–175. <https://doi.org/10.1016/j.matdes.2017.07.060>.
